# Supplementary material for: Insights into chalcone analogues with potential as antioxidant additives in diesel–biodiesel blends
Source: Royal Society of Chemistry journal article supplement (doi:10.1039/d2ra07300e), 2022-01-01
Supplement: d2ra07300e1.pdf [file d2ra07300e1.pdf]

## SUPPLEMENTARY MATERIAL

### Insights on chalcone analogues with potential as antioxidant additive for diesel-biodiesel blends

Igor D. Borges<sup>\*a,b</sup>, Eduardo C. M. Faria<sup>a,b</sup>, Jean F. M Custódio<sup>a</sup>, Vitor S. Duarte<sup>a,b</sup>,  
Fernanda S. Fernandes<sup>c</sup>, Christian G. Alonso<sup>c</sup>, Flávio O. Sanches-Neto<sup>a,d</sup>, Valter H.  
Carvalho-Silva<sup>a</sup>, Guilherme R. Oliveira<sup>c</sup> and Hamilton B. Napolitano<sup>\*a</sup>

<sup>a</sup> Grupo de Química Teórica e Estrutural de Anápolis, Universidade Estadual de Goiás, Anápolis, GO, Brasil

<sup>b</sup> Centro de Pesquisa e Eficiência Energética, CAO Montadora de Veículos LTDA, Anápolis, GO, Brasil.

<sup>c</sup> Instituto de Química, Universidade Federal de Goiás, Goiânia, GO, Brazil.

<sup>d</sup> Instituto de Química, Universidade de Brasília, Brasília, DF, Brazil.

\* hamilton@ueg.br, i.dalarmelino@gmail.com

Phone: +55 (62) 3328-1156

#### Contents

**Table S1.** The experimental (X-ray) geometric parameters of BCH and NCH: bond lengths (Å).

**Table S2.** The experimental (X-ray) geometric parameters of BCH and NCH: bond angle (°).

**Figure S1.** Angles between aromatic ring planes. BCH (a)  $\delta_1 = 6.75$  (Ring 1 and 2),  $\delta_2 = 13.03$  (Ring 2 and 3), NCH (b)  $\delta_3 = 9.24$  (Ring 1 and 2),  $\delta_4 = 6.62$  (Ring 2 and 3) and  $\delta_5 = 21.83$  (Ring 1 and 3)

**Table S1.** The experimental (X-ray) geometric parameters of BCH and NCH: bond lengths (Å).

|         | BCH    | NCH    |         | BCH    | NCH    |
|---------|--------|--------|---------|--------|--------|
| Br1-C21 | 1.8985 | -      | C14-H14 | 0.9500 | 0.9500 |
| O2-C9   | 1.3624 | 1.3708 | C10-H10 | 0.9500 | 0.9499 |
| O2-C8   | 1.4204 | 1.4221 | C10-C11 | 1.3836 | 1.3845 |
| O1-C7   | 1.2129 | 1.2136 | C11-H11 | 0.9500 | 0.9500 |
| O3-C15  | 1.2281 | 1.2273 | C1-H1   | 0.9500 | 0.9500 |
| C6-C7   | 1.4958 | 1.4895 | C1-C2   | 1.3853 | 1.3836 |
| C6-C1   | 1.3939 | 1.3960 | C23-H23 | 0.9500 | 0.9500 |
| C6-C5   | 1.3959 | 1.3933 | C23-C22 | 1.3836 | 1.3833 |
| C9-C14  | 1.3959 | 1.3942 | C5-H5   | 0.9500 | 0.9500 |
| C9-C10  | 1.3972 | 1.3931 | C5-C4   | 1.3859 | 1.3903 |
| C12-C13 | 1.4048 | 1.3998 | C20-H20 | 0.9500 | -      |
| C12-C15 | 1.4859 | 1.4865 | C20-C19 | 1.3854 | 1.3823 |
| C12-C11 | 1.3956 | 1.3949 | C8-H8A  | 0.9900 | 0.9900 |
| C18-C17 | 1.4629 | 1.4620 | C8-H8B  | 0.9900 | 0.9899 |
| C18-C23 | 1.4020 | 1.4005 | C19-H19 | 0.9500 | 0.9499 |
| C18-C19 | 1.3962 | 1.3963 | C4-H4   | 0.9500 | 0.9499 |
| C16-H16 | 0.9500 | 0.9500 | C4-C3   | 1.3823 | 1.3802 |
| C16-C17 | 1.3290 | 1.3343 | C22-H22 | 0.9500 | 0.9500 |
| C16-C15 | 1.4831 | 1.4821 | C2-H2   | 0.9500 | 0.9500 |
| C13-H13 | 0.9500 | 0.9499 | C2-C3   | 1.3957 | 1.3899 |
| C13-C14 | 1.3799 | 1.3812 | C3-H3   | 0.9500 | 0.9500 |
| C7-C8   | 1.5161 | 1.5172 | C21-H21 | -      | 0.9500 |
| C21-C20 | 1.3823 | 1.3805 | O4-N1   | -      | 1.2273 |
| C21-C22 | 1.3821 | 1.3900 | O5-N1   | -      | 1.2242 |
| C17-H17 | 0.9500 | 0.9500 | N1-C20  | -      | 1.4707 |

30

31

**Table S2.** The experimental (X-ray) geometric parameters of BCH and NCH: bond angle (°).

|             | BCH    | NCH    |             | BCH    | NCH    |
|-------------|--------|--------|-------------|--------|--------|
| C9–O2–C8    | 117.04 | 117.12 | H8A–C8–H8B  | 108.42 | 108.37 |
| C7–C6–C1    | 118.19 | 118.21 | C18–C19–C20 | 121.73 | 119.22 |
| C7–C6–C5    | 122.50 | 122.31 | C18–C19–H19 | 119.13 | 120.38 |
| C1–C6–C5    | 119.31 | 119.48 | C20–C19–H19 | 119.13 | 120.40 |
| O2–C9–C14   | 115.51 | 115.37 | C5–C4–H4    | 119.64 | 119.73 |
| O2–C9–C10   | 124.63 | 124.42 | C5–C4–C3    | 120.72 | 120.53 |
| C14–C9–C10  | 119.86 | 120.20 | H4–C4–C3    | 119.64 | 119.75 |
| C13–C12–C15 | 123.70 | 123.75 | C21–C22–C23 | 119.38 | 120.49 |
| C13–C12–C11 | 118.07 | 118.24 | C21–C22–H22 | 120.31 | 119.75 |
| C15–C12–C11 | 118.20 | 117.87 | C23–C22–H22 | 120.31 | 119.76 |
| C17–C18–C23 | 122.33 | 123.09 | C1–C2–H2    | 120.14 | 120.00 |
| C17–C18–C19 | 119.49 | 118.73 | C1–C2–C3    | 119.72 | 120.00 |
| C23–C18–C19 | 118.18 | 118.16 | H2–C2–C3    | 120.14 | 120.00 |
| H16–C16–C17 | 119.61 | 119.87 | C4–C3–C2    | 119.75 | 119.92 |
| H16–C16–C15 | 119.61 | 119.87 | C4–C3–H3    | 120.12 | 120.03 |
| C17–C16–C15 | 120.79 | 120.26 | C2–C3–H3    | 120.12 | 120.04 |
| C12–C13–H13 | 119.69 | 119.77 | C20–C21–H21 | -      | 121.19 |
| C12–C13–C14 | 120.61 | 120.46 | C22–C21–H21 | -      | 121.19 |
| H13–C13–C14 | 119.69 | 119.76 | N1–C20–C19  | -      | 117.77 |
| O1–C7–C6    | 121.58 | 121.96 | N1–C20–C21  |        | 119.13 |
| O1–C7–C8    | 121.72 | 121.39 | O4–N1–O5    | -      | 123.58 |
| C6–C7–C8    | 116.69 | 116.64 | O4–N1–C20   | -      | 118.45 |
| Br1–C21–C20 | 119.36 | -      | O5–N1–C20   | -      | 117.96 |
| Br1–C21–C22 | 118.94 | -      | C6–C1–H1    | 119.69 | 119.86 |
| C20–C21–C22 | 121.69 | 117.62 | C6–C1–C2    | 120.62 | 120.30 |
| C18–C17–C16 | 127.01 | 127.13 | H1–C1–C2    | 119.69 | 119.85 |
| C18–C17–H17 | 116.50 | 116.43 | C18–C23–H23 | 119.68 | 119.30 |
| C16–C17–H17 | 116.49 | 116.43 | C18–C23–C22 | 120.65 | 121.40 |
| O3–C15–C12  | 120.52 | 120.69 | H23–C23–C22 | 119.68 | 119.30 |
| O3–C15–C16  | 120.77 | 120.69 | C6–C5–H5    | 120.07 | 120.13 |
| C12–C15–C16 | 118.71 | 118.61 | C6–C5–C4    | 119.87 | 119.75 |
| C9–C14–C13  | 120.40 | 120.26 | H5–C5–C4    | 120.07 | 120.12 |
| C9–C14–H14  | 119.80 | 119.87 | C21–C20–H20 | 120.82 | -      |
| C13–C14–H14 | 119.80 | 119.87 | C21–C20–C19 | 118.36 | 123.09 |
| C9–C10–H10  | 120.46 | 120.64 | H20–C20–C19 | 120.82 | -      |
| C9–C10–C11  | 119.09 | 118.73 | O2–C8–C7    | 108.09 | 108.40 |
| H10–C10–C11 | 120.46 | 120.63 | O2–C8–H8A   | 110.08 | 110.02 |
| C12–C11–C10 | 121.95 | 121.99 | O2–C8–H8B   | 110.08 | 110.02 |
| C12–C11–H11 | 119.02 | 119.01 | C7–C8–H8A   | 110.08 | 110.01 |
| C10–C11–H11 | 119.02 | 119.01 | C7–C8–H8B   | 110.08 | 110.02 |

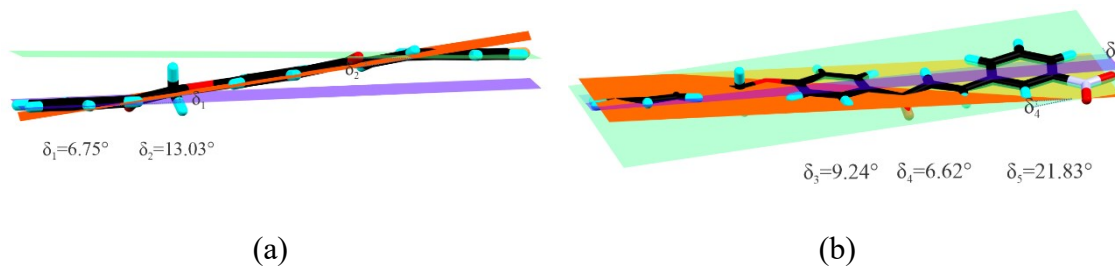

**Figure S1.** Angles between aromatic ring planes. BCH (a)  $\delta_1 = 6.75$  (Ring 1 and 2),  $\delta_2 = 13.03$  (Ring 2 and 3), NCH (b)  $\delta_3 = 9.24$  (Ring 1 and 2),  $\delta_4 = 6.62$  (Ring 2 and 3) and  $\delta_5 = 21.83$  (Ring 1 and 3)
